# Supplementary material
Source: Springer Nature journal article supplement (http://link.springer.com/content/esm/art:10.1186/1478-4491-12-13/file/MediaObjects/12960_2013_399_MOESM1_ESM.pdf)
Supplement: MOESM1 [file 12960_2013_399_MOESM1_ESM.pdf]

## Additional File 1: Documents Analysed

| <b>British Columbia</b>                                                                                                                                                                                                            | <b>Ontario</b>                                                                                                                                                                                                                               |
|------------------------------------------------------------------------------------------------------------------------------------------------------------------------------------------------------------------------------------|----------------------------------------------------------------------------------------------------------------------------------------------------------------------------------------------------------------------------------------------|
| Ministry of Health Services. (2005). <i>Public health renewal in British Columbia: An overview of core functions in public health</i> . Victoria, BC: Author.                                                                      | Ontario Expert Panel on SARS and Infectious Disease Control. (2003). <i>For the public's health: Initial report of the Ontario expert panel on SARS and infectious disease control</i> . Toronto, ON: Ministry of Health and Long-Term Care. |
| Ministry of Health Services. (2005). <i>A framework for core functions in public health: Resource document</i> . Victoria, BC: Author.                                                                                             | Association of Local Public Health Agencies. (2004). <i>Creating a sustainable public health system in Ontario</i> . Toronto, ON: Author.                                                                                                    |
| BC Ministry of Health. (2007). <i>Model core program paper: Healthy communities</i> . Victoria, BC: Author.                                                                                                                        | Ontario Ministry of Health and Long-Term Care. (2004). <i>Operation health protection</i> . Toronto, ON: Author                                                                                                                              |
| BC Ministry of Health. (2007). <i>Model core program paper: Healthy living</i> . Victoria, BC: Author.                                                                                                                             | The SARS Commission. (2004). <i>Interim report: SARS and public health in Ontario</i> . Toronto, ON: Ministry of Health and Long-Term Care.                                                                                                  |
| Public Health Association of British Columbia. (2007). <i>BC map of public health services</i> . Vancouver, BC: Author.                                                                                                            | The SARS Commission. (2005). <i>Second interim report: SARS and public health legislation</i> . (). Toronto, ON: The SARS Commission.                                                                                                        |
| BC Ministry of Health. (2007). <i>Model core program paper: Health assessment and disease surveillance</i> . Victoria, BC: Author.                                                                                                 | Starfield Consulting. (2006). <i>Report on stakeholder consultations in public health units in the province of Ontario to the Capacity Review Committee</i> . Toronto, ON: Ministry of Health and Long-Term Care.                            |
| Zena Simces & Associates. (2008). <i>Core and technical competencies for public health in BC: Phase 1 – needs assessment interim report for distribution</i> . Victoria, BC: The Public Health Association of BC.                  | Ontario Ministry of Health and Long-Term Care. (2006). <i>Final report of the agency implementation task force: From vision to action: A plan for the Ontario agency for health protection and promotion</i> . Toronto, ON: Author           |
| Public Health Association of British Columbia. (2008). <i>Consultation document: Core and technical competencies for public health in BC</i> . Victoria, BC: Author.                                                               | Capacity Review Committee. (2006). <i>Revitalizing Ontario's public health capacity: The final report of the capacity review committee</i> . Toronto, ON: Queen's Printer for Ontario.                                                       |
| Government of British Columbia. (2008). Public Health Act. <a href="http://www.bclaws.ca/EPLibraries/bclaws_new/document/ID/freeside/00_08028_01">http://www.bclaws.ca/EPLibraries/bclaws_new/document/ID/freeside/00_08028_01</a> | HealthForceOntario. (2007). <i>Health human resources toolkit</i> . Toronto, ON: Author                                                                                                                                                      |
| Zena Simces & Associates. (2008). <i>Core and technical competencies for public health in BC: Phase 1 – needs assessment technical report</i> . Victoria, BC: The Public Health Association of BC.                                 | Government of Ontario. (2009). <i>Regulated Health Professions Act, 1991</i> . Toronto, ON: Government of Ontario.                                                                                                                           |
| BC Ministry of Healthy Living and Sport. (2009). <i>Model core program paper: Reproductive health and prevention of disabilities</i> . Victoria, BC: Author.                                                                       | Ontario Public Health Association and Partners. (2009). <i>Ontario public health performance management competency profiles</i> . Toronto, ON: Author.                                                                                       |
| BC Ministry of Healthy Living and Sport. (2009). <i>Model core program paper: Communicable disease</i> . Victoria, BC: Author.                                                                                                     | Ontario Ministry of Health and Long-Term Care. (2009). <i>Infectious diseases protocol</i> . (). Toronto, ON: Ontario Ministry of Health and Long-Term Care.                                                                                 |
| Health Employer's Association of British Columbia. (2009). <i>Health human resource profile of selected public health occupational groups in British Columbia</i> . Vancouver, BC: Author.                                         | Ontario Ministry of Health and Long-Term Care. (2009). <i>Ontario public health standards 2008</i> . Toronto, ON: Ontario Ministry of Health and Long-Term Care.                                                                             |
| BC Ministry of Healthy Living and Sport. (2009). <i>Model core program paper: Healthy infant and</i>                                                                                                                               | Ontario Ministry of Health and Long-Term Care. (2009). <i>Nutritious food basket protocol</i> . Toronto, ON: Author                                                                                                                          |

| <b>British Columbia</b>                                                                                                                                                                                                                                                           | <b>Ontario</b>                                                                                                                                                     |
|-----------------------------------------------------------------------------------------------------------------------------------------------------------------------------------------------------------------------------------------------------------------------------------|--------------------------------------------------------------------------------------------------------------------------------------------------------------------|
| <i>child development</i> . Victoria, BC: Author.                                                                                                                                                                                                                                  |                                                                                                                                                                    |
| British Columbia Provincial Health Officer. (2009). <i>Pathways to health and healing – 2nd report on the health and well-being of Aboriginal people in British Columbia provincial health Officer’s annual report 2007</i> . Victoria, BC: Ministry of Healthy Living and Sport. | Ontario Ministry of Health and Long-Term Care. (2009). <i>Population health assessment and surveillance protocol</i> . Toronto, ON: Author                         |
| Government of British Columbia. (2010) Health Professions Act [RSBC 1996]                                                                                                                                                                                                         | Ontario Ministry of Health and Long-Term Care. (2009). <i>Sexual health and sexually transmitted infections prevention and control panel</i> . Toronto, ON: Author |
| Ministry of Healthy Living and Sport. (2010). <i>BC ministry of healthy living and sport 2009-2010 annual service report</i> . Victoria, BC: Author.                                                                                                                              | Ontario Ministry of Health and Long-Term Care. (2009). <i>Tobacco compliance protocol</i> . Toronto, ON: Author                                                    |
| BC Ministry of Healthy Living and Sport. (2010). <i>Model core program paper: Prevention of chronic disease</i> . Victoria, BC: Author.                                                                                                                                           | Government of Ontario. (2009). <i>Health Protection and Promotion Act, 2009</i> . Toronto, ON: Government of Ontario.                                              |
| BC Ministry of Healthy Living and Sport. (2010). <i>Model core program paper: Healthy child and youth development</i> . Victoria, BC: Author.                                                                                                                                     | Agency for Health Protection and Promotion. (2009). <i>Strategic plan 2010-2013</i> . Toronto, ON: Author                                                          |
| Public Health Association of British Columbia. (2010). <i>Context and connections matrix: Core and technical competencies for public health in BC project</i> . Vancouver, BC: Author.                                                                                            | Agency for Health Protection and Promotion. (2010). <i>Annual report. 2008-2009</i> . Toronto, ON: Agency for Health Protection and Promotion.                     |
| Hollander Analytical Services Ltd. (2010). <i>Final report of the midterm evaluation, and a framework for future evaluations, for the core and technical competencies for public health in BC project</i> . Vancouver, BC: Public Health Association of British Columbia.         |                                                                                                                                                                    |
| Public Health Association of British Columbia. (2011). <i>Update on the PHABC’s public health core competencies Project in BC</i> . Vancouver, BC: Author.                                                                                                                        |                                                                                                                                                                    |
| Ministry of Health Services. (2011). <i>Enumeration of BC public health system workforce pilot project plan (draft)</i> . Victoria, BC: Author.                                                                                                                                   |                                                                                                                                                                    |
| Ministry of Health Services. (2011). <i>Discussion paper to support the first nations health human resources cluster</i> . Victoria, BC: Author.                                                                                                                                  |                                                                                                                                                                    |
| Public Health Association of British Columbia. (ND). <i>Backgrounder to a proposal for a public health workforce development network</i> . Vancouver, BC: Author.                                                                                                                 |                                                                                                                                                                    |
| BC Ministry of Healthy Living & Sport. (ND). <i>Public health human resources plan 2010</i> . Victoria, BC: Author.                                                                                                                                                               |                                                                                                                                                                    |
| Health Care Leaders Association of British Columbia. (ND). <i>BC health leadership capabilities framework</i> . Vancouver, BC: Author.                                                                                                                                            |                                                                                                                                                                    |
